# Supplementary material
Source: Springer Nature journal article supplement (https://www.springermedizin.de/resource/supplementary/12933_2005_54_MOESM2_ESM.pdf/9539528)

# Non Diabetic and Diabetic Left Ventricular Mass/Body Weight

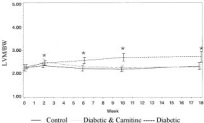

\*Mass than control by  $p < 0.05$

Supplement: MOESM2 [file 9539528]
